# Supplementary material for: Adsorption mechanisms of decomposition species of CHON-containing explosives on aluminum surfaces
Source: Royal Society of Chemistry journal article supplement (doi:10.1039/d3cp06223f), 2024-01-01
Supplement: d3cp06223f1.pdf [file d3cp06223f1.pdf]

# **Adsorption mechanisms of decomposition species of CHON-containing explosives on aluminum surfaces**

**Kai Zhong<sup>†</sup> and Chaoyang Zhang<sup>\*†,‡</sup>**

<sup>†</sup> *Institute of Chemical Materials, China Academy of Engineering Physics (CAEP), P. O. Box 919-311, Mianyang, Sichuan 621900, China.*

<sup>‡</sup> *Beijing Computational Science Research Center, Beijing 100193, China.*

## **Supporting Information (SI)**

### **Table of Contents**

S1. Density of states (DOS) distributions of the Al surfaces before and after adsorbing different species.

## S1. Density of states (DOS) distributions of the Al surfaces before and after adsorbing different species.

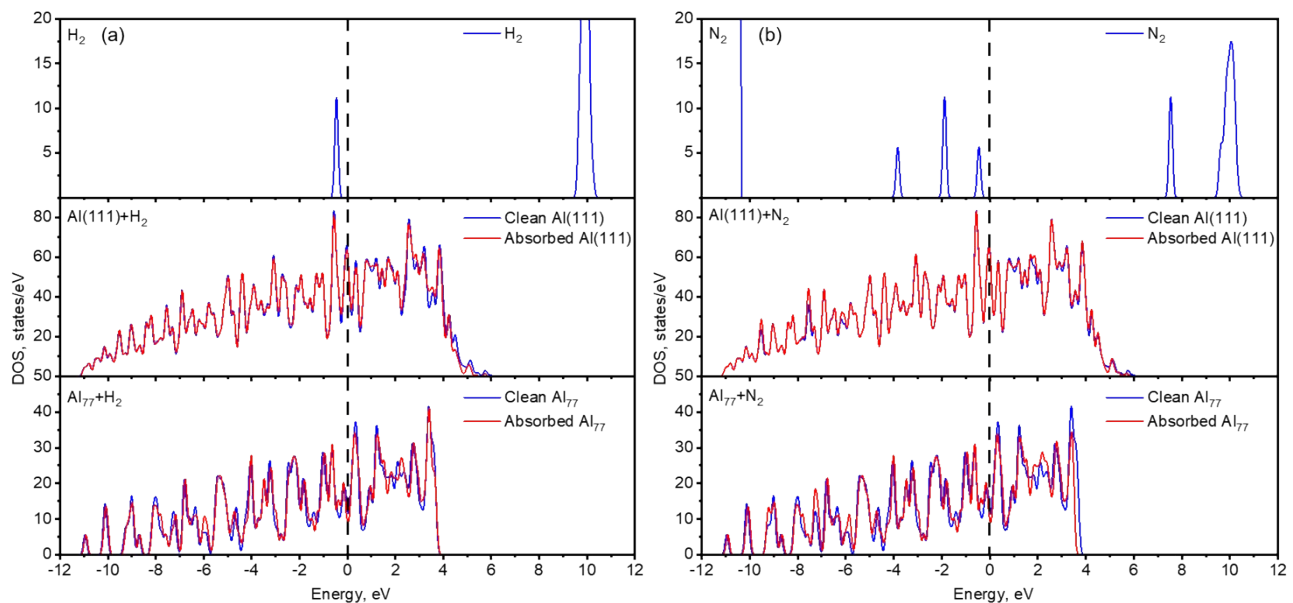

**Fig. S1** DOSs of different Al surfaces before and after adsorption of  $H_2$  (a) and  $N_2$  (b), and DOSs of corresponding free molecules are also plotted in the top of figure. The dashed line represents the Fermi level. This representation is also employed in following figures.

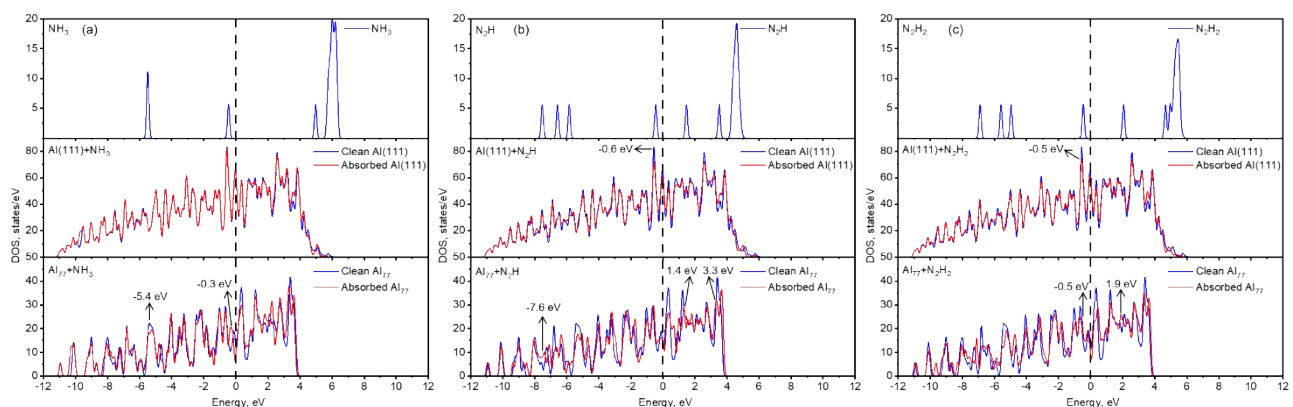

**Fig. S2** DOSs of different Al surfaces before and after adsorption of  $NH_3$  (a),  $N_2H$  (b) and  $N_2H_2$  (c). The arrow indicates the positions of the DOS peaks change on the adsorbed Al surface compared to the clean surface.

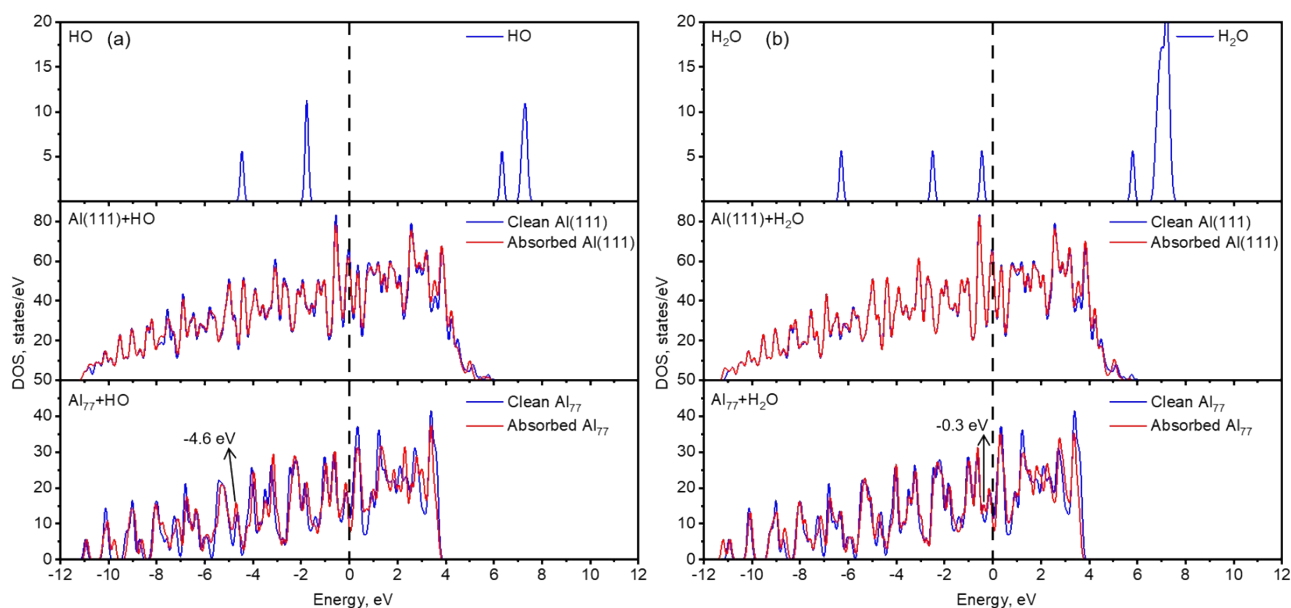

**Fig. S3** DOSs of different Al surfaces before and after adsorption of HO (a) and H<sub>2</sub>O (b).

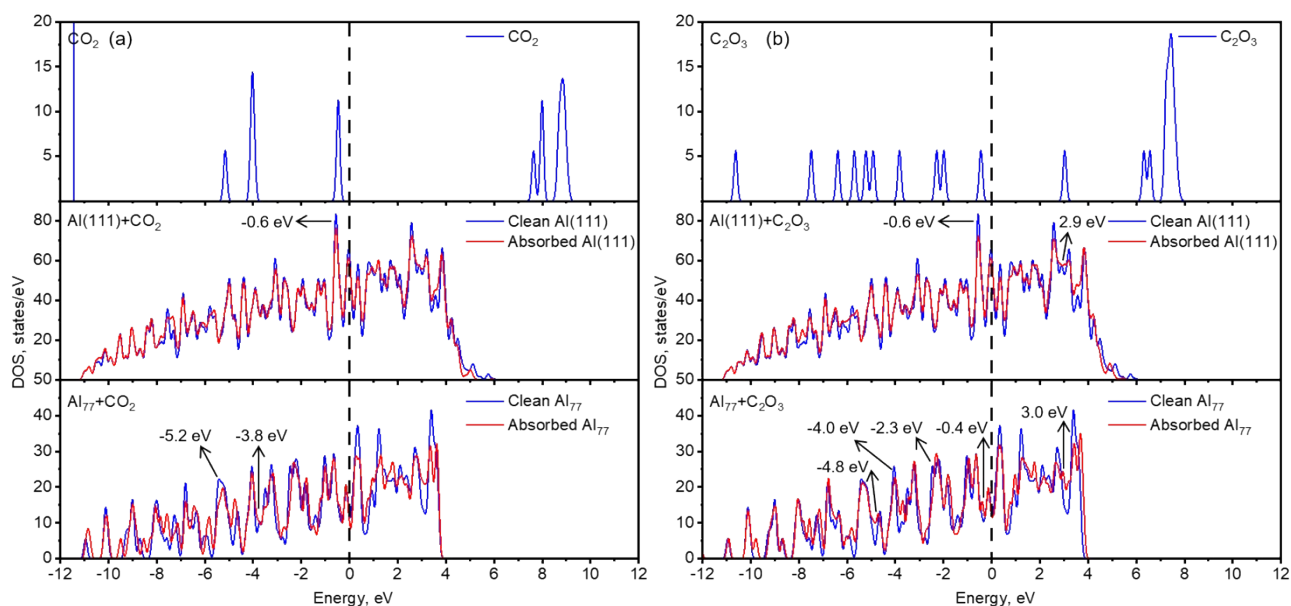

**Fig. S4** DOSs of different Al surfaces before and after adsorption of CO<sub>2</sub> (a, b) and C<sub>2</sub>O<sub>3</sub> (c, d).
